# Supplementary material
Source: publisher site journal article supplement (https://www.dovepress.com/article/457302)
Supplement: Supplementary file 1 [file get_supplementary_file.php]

**Supplementary material**

**Table S1** Weight Yield % of LNPs DPPC:Chol:DOTAP 1:1:x, with variable amounts of DOPE-Rhod. Mean ± SD

| **Weight yield of LNPs**  **DPPC:Chol:DOTAP 1:1:x**  **DOPE-Rhod 0-100 µg/formulation** | | |
| --- | --- | --- |
| DOTAP | µg DOPE-Rhod | Weight Yield ± SD % |
| 0.05 | 0 | 60 ± 7 |
| 10 | 63 ± 8 |
| 50 | 61 ± 8 |
| 100 | 61 ± 6 |
| 0.1 | 0 | 59 ± 6 |
| 10 | 59 ± 9 |
| 50 | 73 ± 5 |
| 100 | 70 ± 5 |
| 0.5 | 0 | 67 ± 9 |
| 10 | 80 ± 6 |
| 50 | 60 ± 8 |
| 100 | 71 ± 6 |


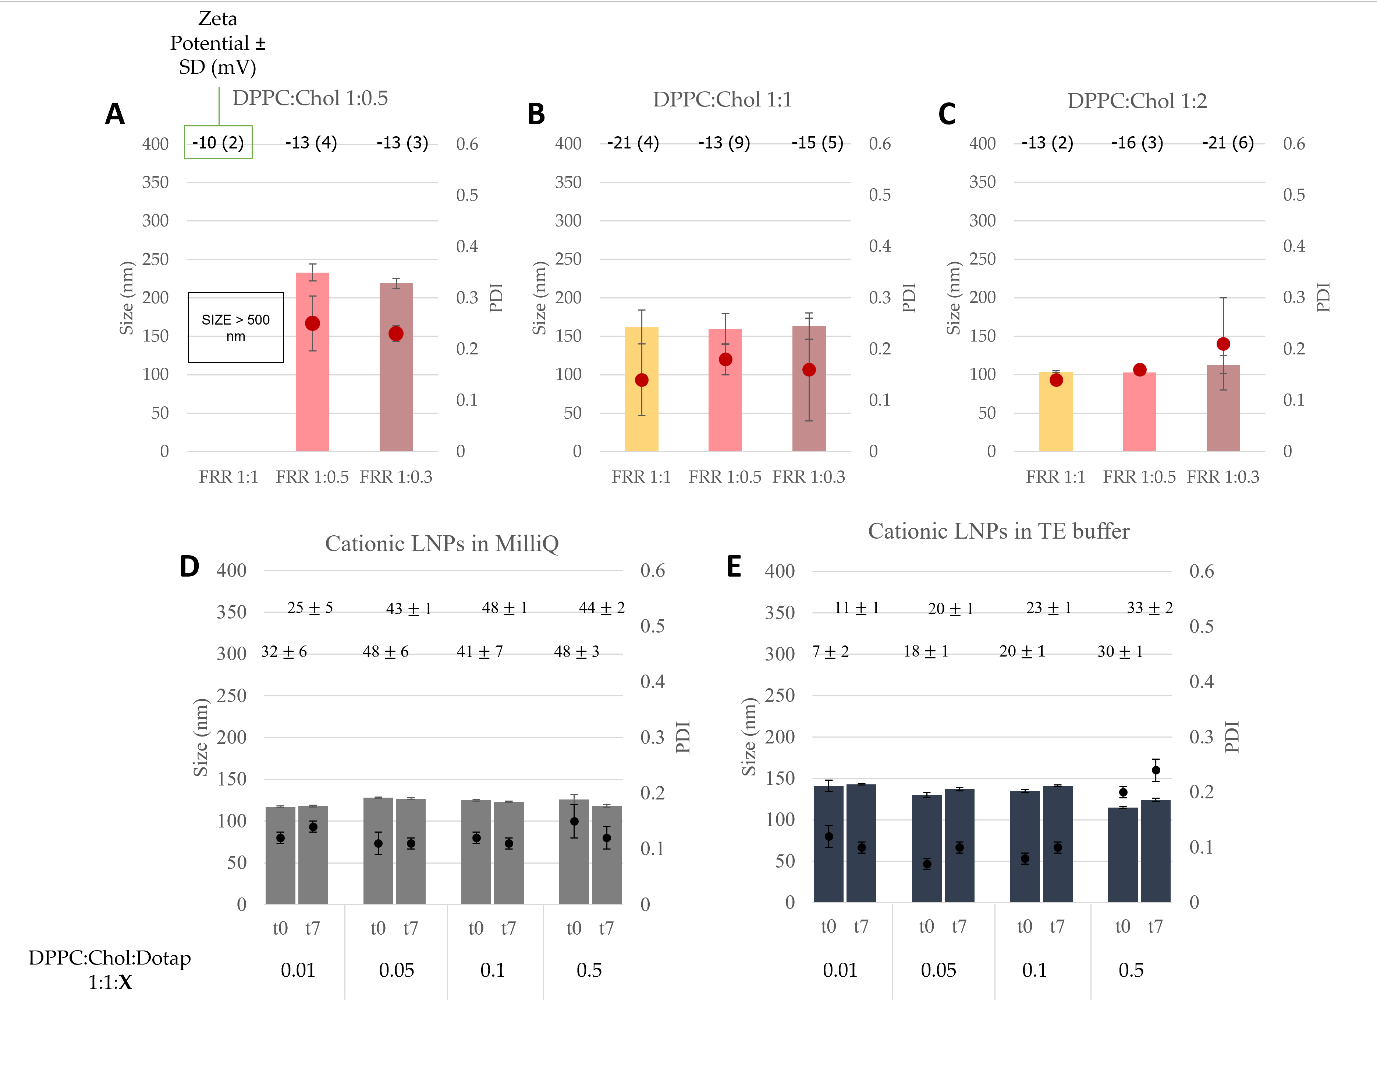


**Figure S1**: Optimization of the formulative parameters for LNP formulation. Optimization of the FRR from 1:1 to 1:0.3: size, PDI, and Zeta potential of neutral LNPs formulated with different FRR and constituted by a molar ratio of DPPC:Chol of A) 1:0.5, B) 1:1, C) 1:2. Neutral LNPs produced with DPPC:Chol 1:0.1 molar ratio were not graphed as they displayed a size > 1 µm and PDI > 0.8 independent from the FRR used.

Optimization of the aqueous phase: size, PDI, and Zeta potential of cationic LNPs with FRR 1:1 and different amounts of Dotap (DPPC:Chol:Dotap 1:1:X) from 0.01 to 0.5, freshly prepared (t0) or after 7 days at 4°C (t7), formulated with either MilliQ water (D) or TE buffer (E) as aqueous phase.


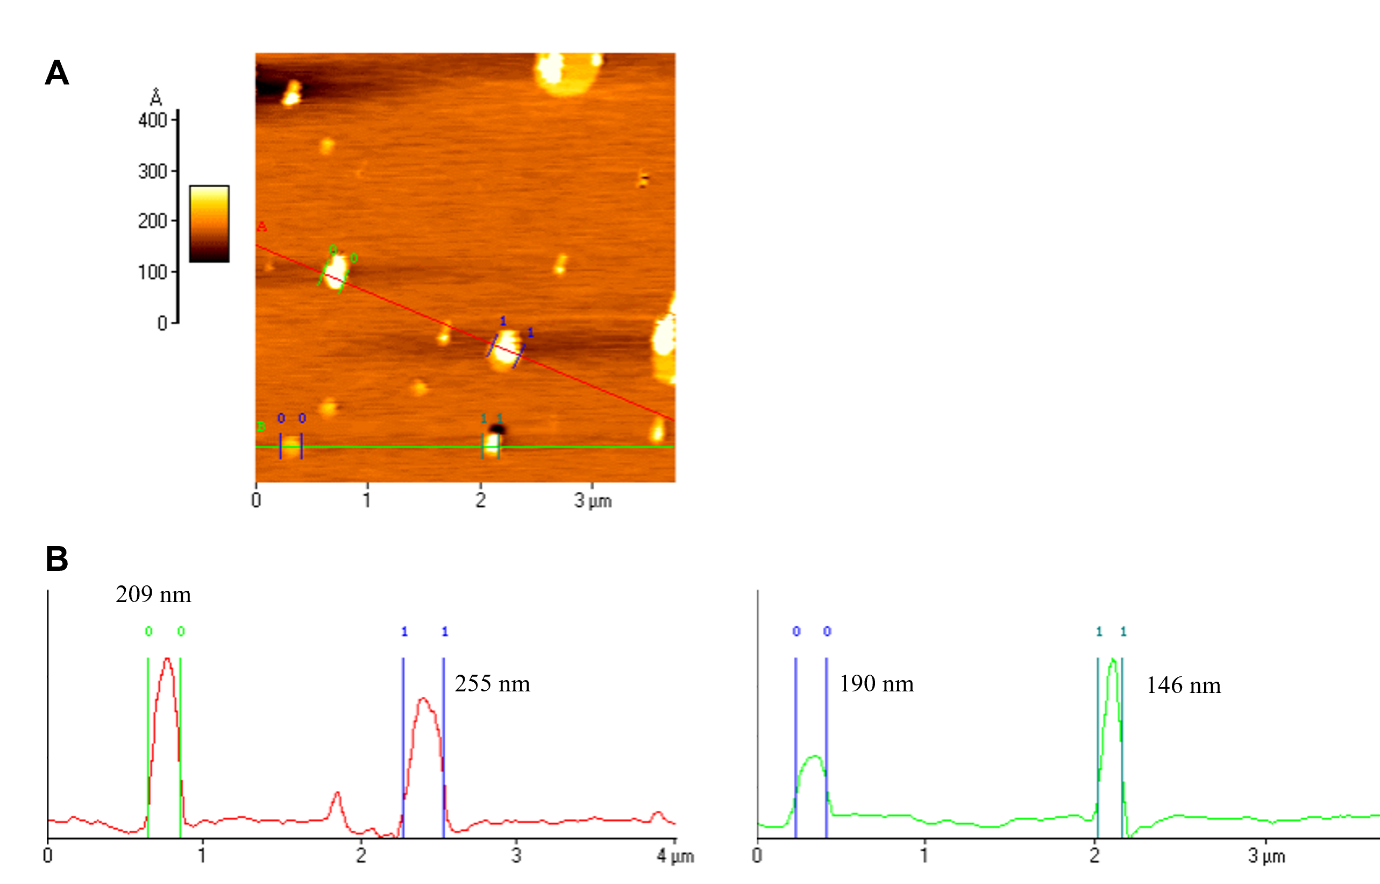


**Figure S2** AFM image of empty LNPs of DPPC:Chol:DOTAP 1:1:0.1 with 10 µg of DOPE-Rhod. A) Topography image. B) Profile analysis.

**Table S2** Weight Yield % of plasmid loaded LNPs with the two methods.

| **Weight yield % with the two methods and with different plasmid concentrations** | | |
| --- | --- | --- |
| Method | Plasmid concentration mg/mL | Weight Yield ± SD % |
| «Post» | 5 | 57 ± 7 |
| 10 | 68 ± 5 |
| 15 | 61 ± 7 |
| «Pre» | 5 | 57 ± 7 |
| 10 | 68 ± 5 |
| 15 | 61 ± 7 |
| 30 | 64 ± 7 |
| 50 | 65 ± 5 |
| 100 | 49 ± 6 |


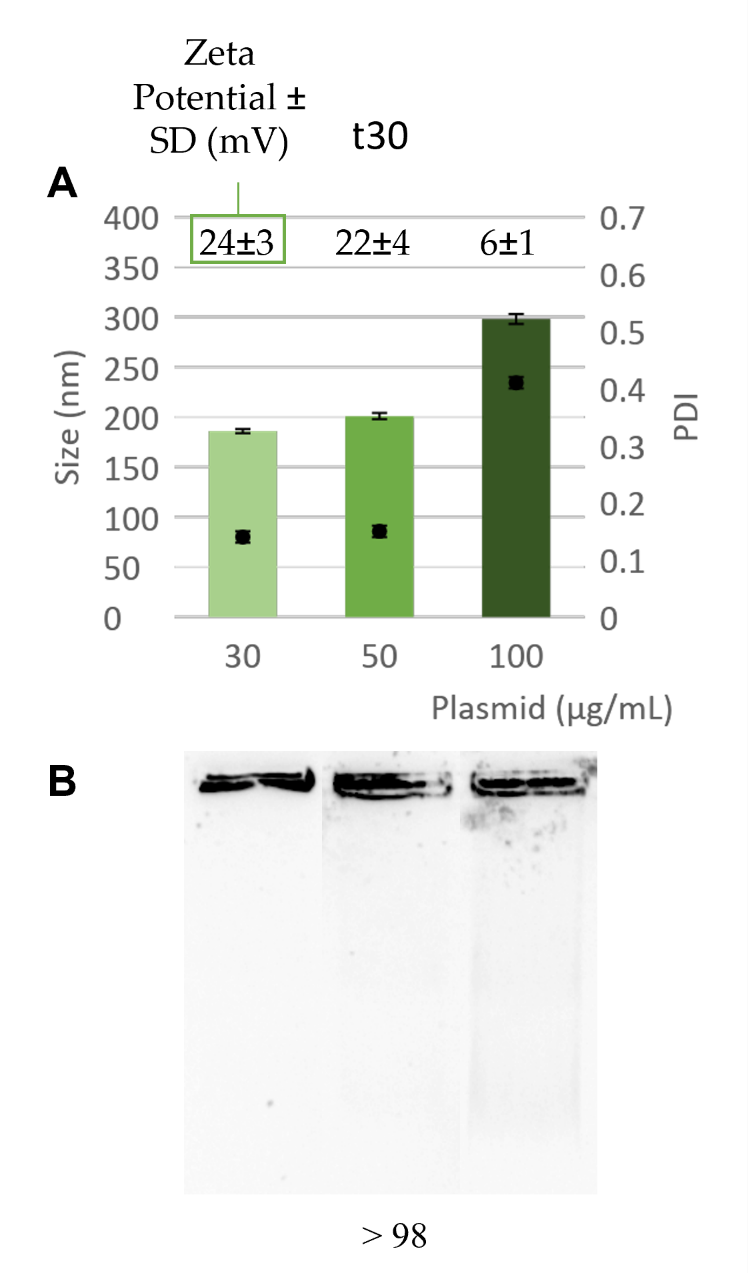


**Figure S3** Dimensional stability of plasmid loaded LNPs. A) Size, PDI, and Zeta potential of LNPs at different plasmid concentrations after 1 month storage at 4°C. B) Electrophoretic run for plasmid retention; the wells correspond to the respective bars above (representative gel). All samples were analyzed in triplicate, data represent Mean ± SD.

**Table S3** Weight Yield % of plasmid loaded neutral LNPs formulated with the two methods.

| **Weight yield % of neutral LNPs with the two methods and with different plasmid concentrations** | | |
| --- | --- | --- |
| Method | Plasmid concentration mg/mL | Weight Yield ± SD % |
| «Post» | 5 | 79 5 |
| 10 | 68 7 |
| 15 | 76 5 |
| «Pre» | 5 | 79 5 |
| 10 | 68 7 |
| 15 | 76 5 |
| 30 | 72 4 |
| 50 | 70 7 |
| 100 | 67 6 |


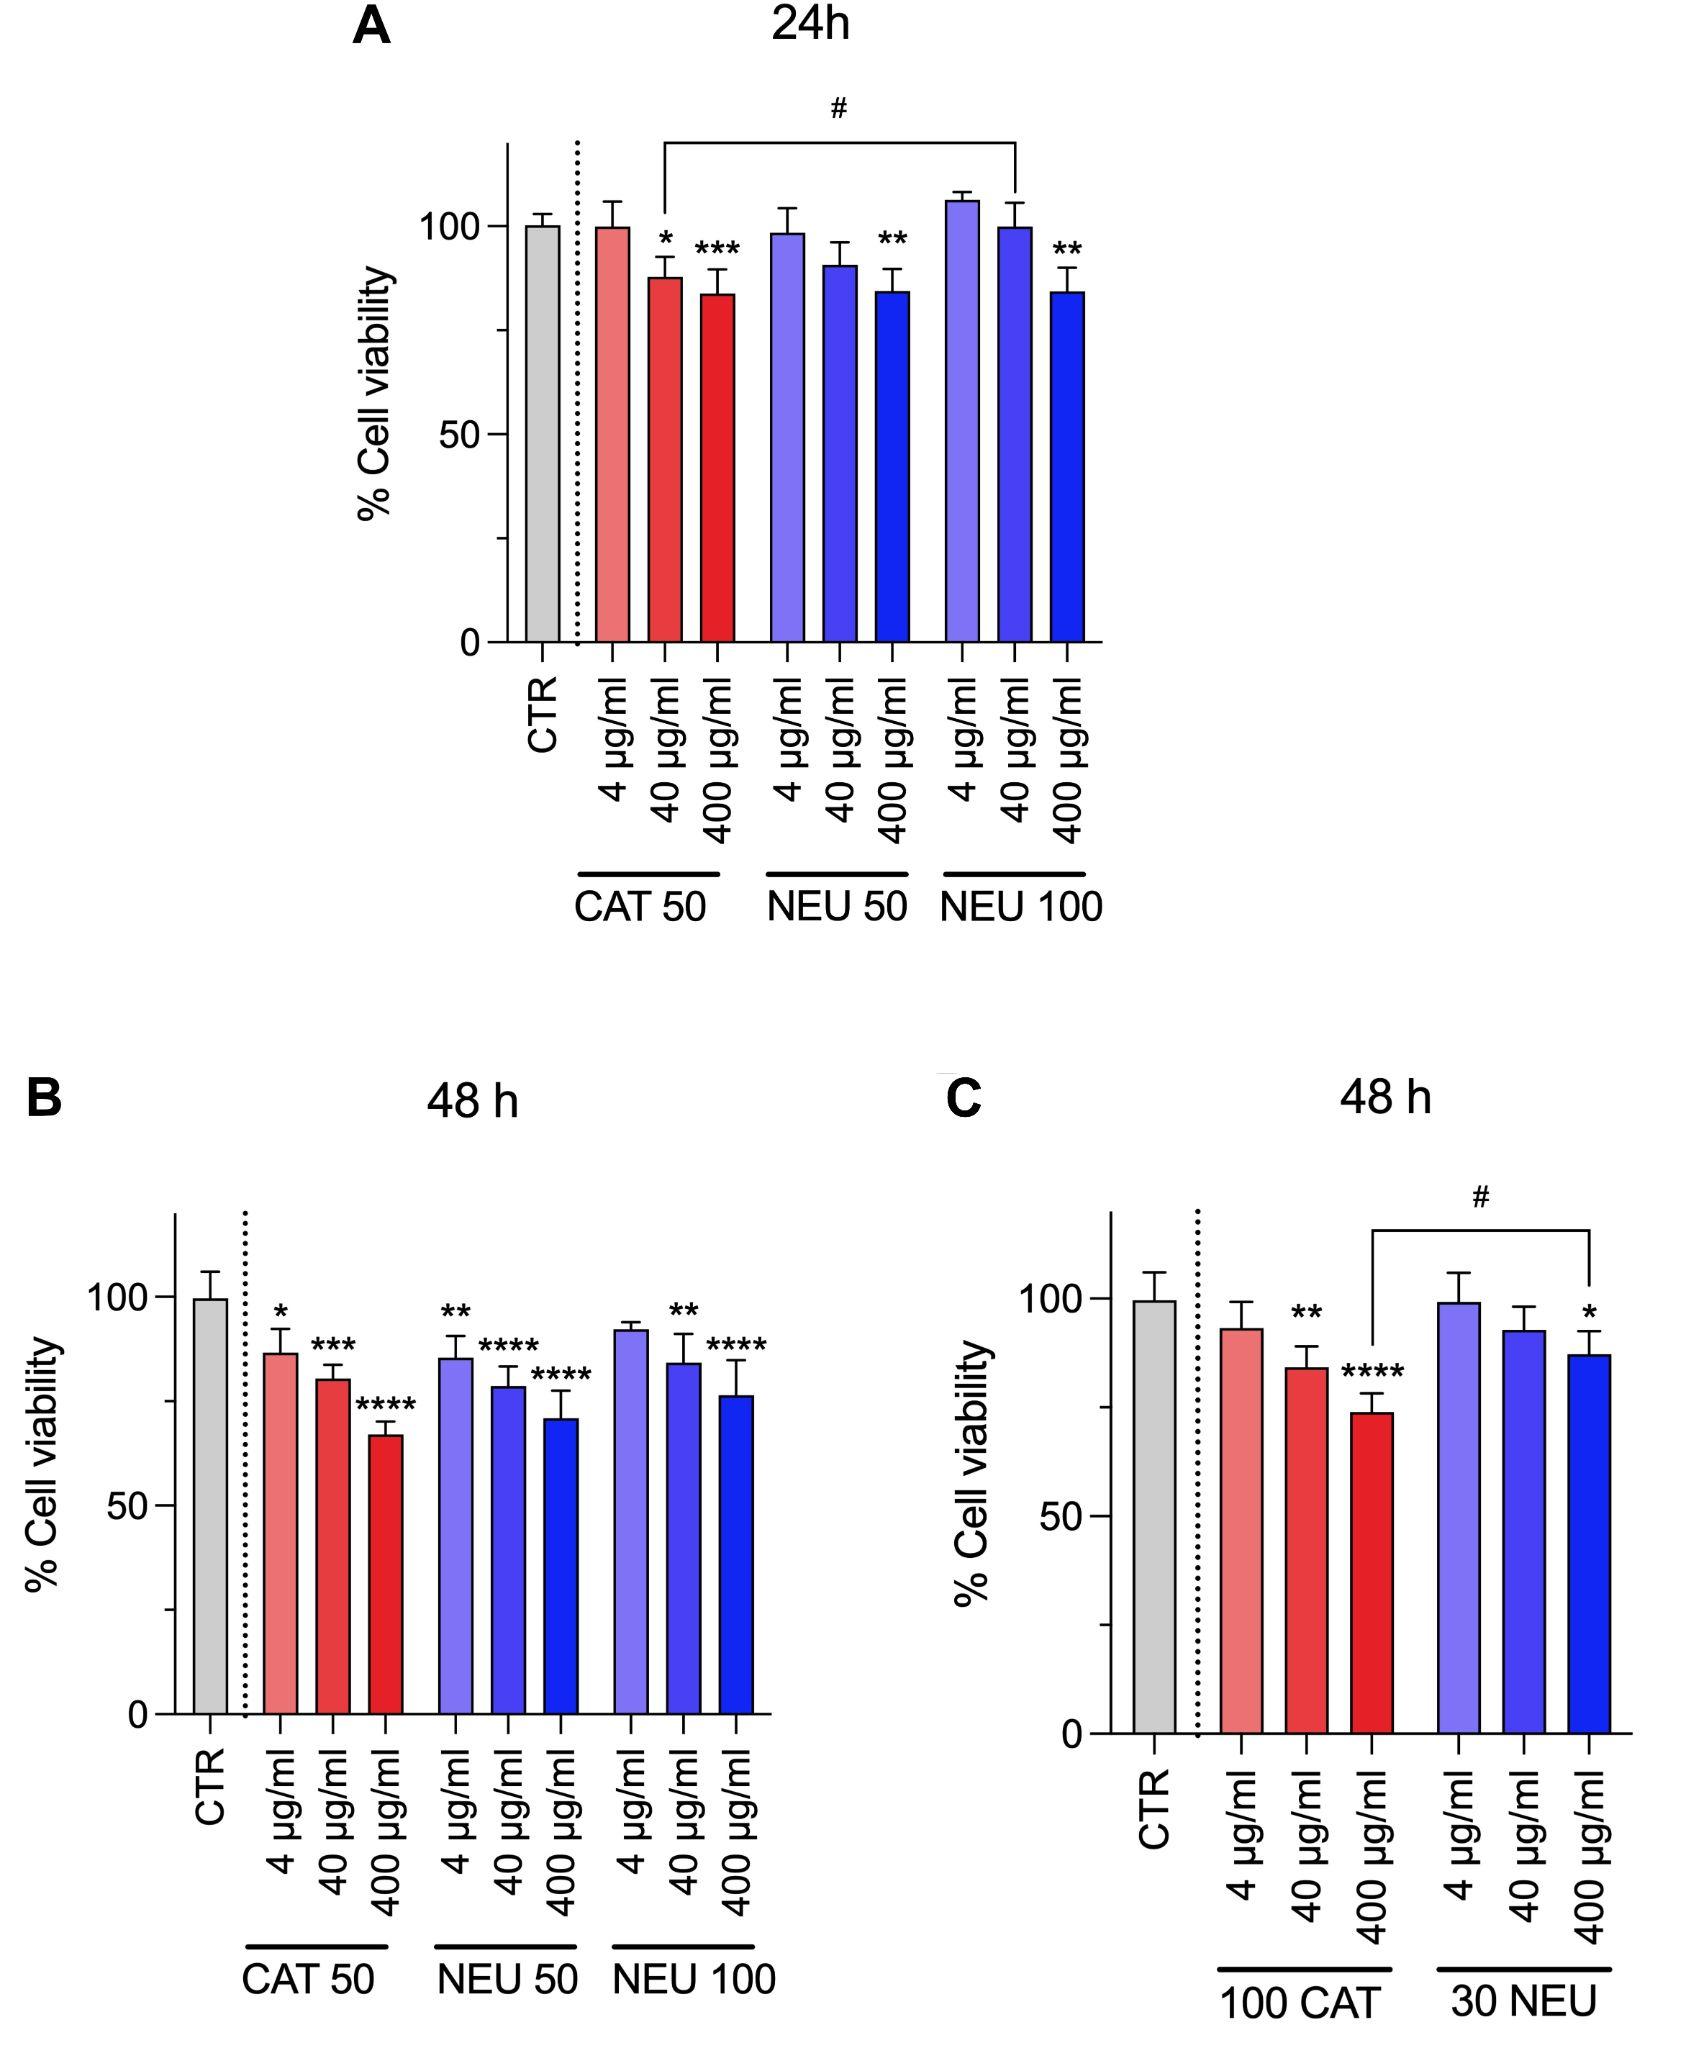


**Figure S4** Cell viability of ARPE-19 cells after administration of LNPs.

Cationic LNPs with 50 µg/mL pDNA and neutral LNPs with 50 µg/mL or 100 µg/mL pDNA (A) after 24h, and (B) after 48h from administration. (C) Cationic LNPs with 100 µg/mL pDNA and neutral LNPs with 30 µg/mL after 48h from administration. Untreated cells were set at 100% cell viability and used as control; asterisks represent significance compared to control, hashtags represent significance between the marked groups: # or * p < 0.5, ** p < 0.01, *** p < 0.001, and **** p < 0.0001.

**
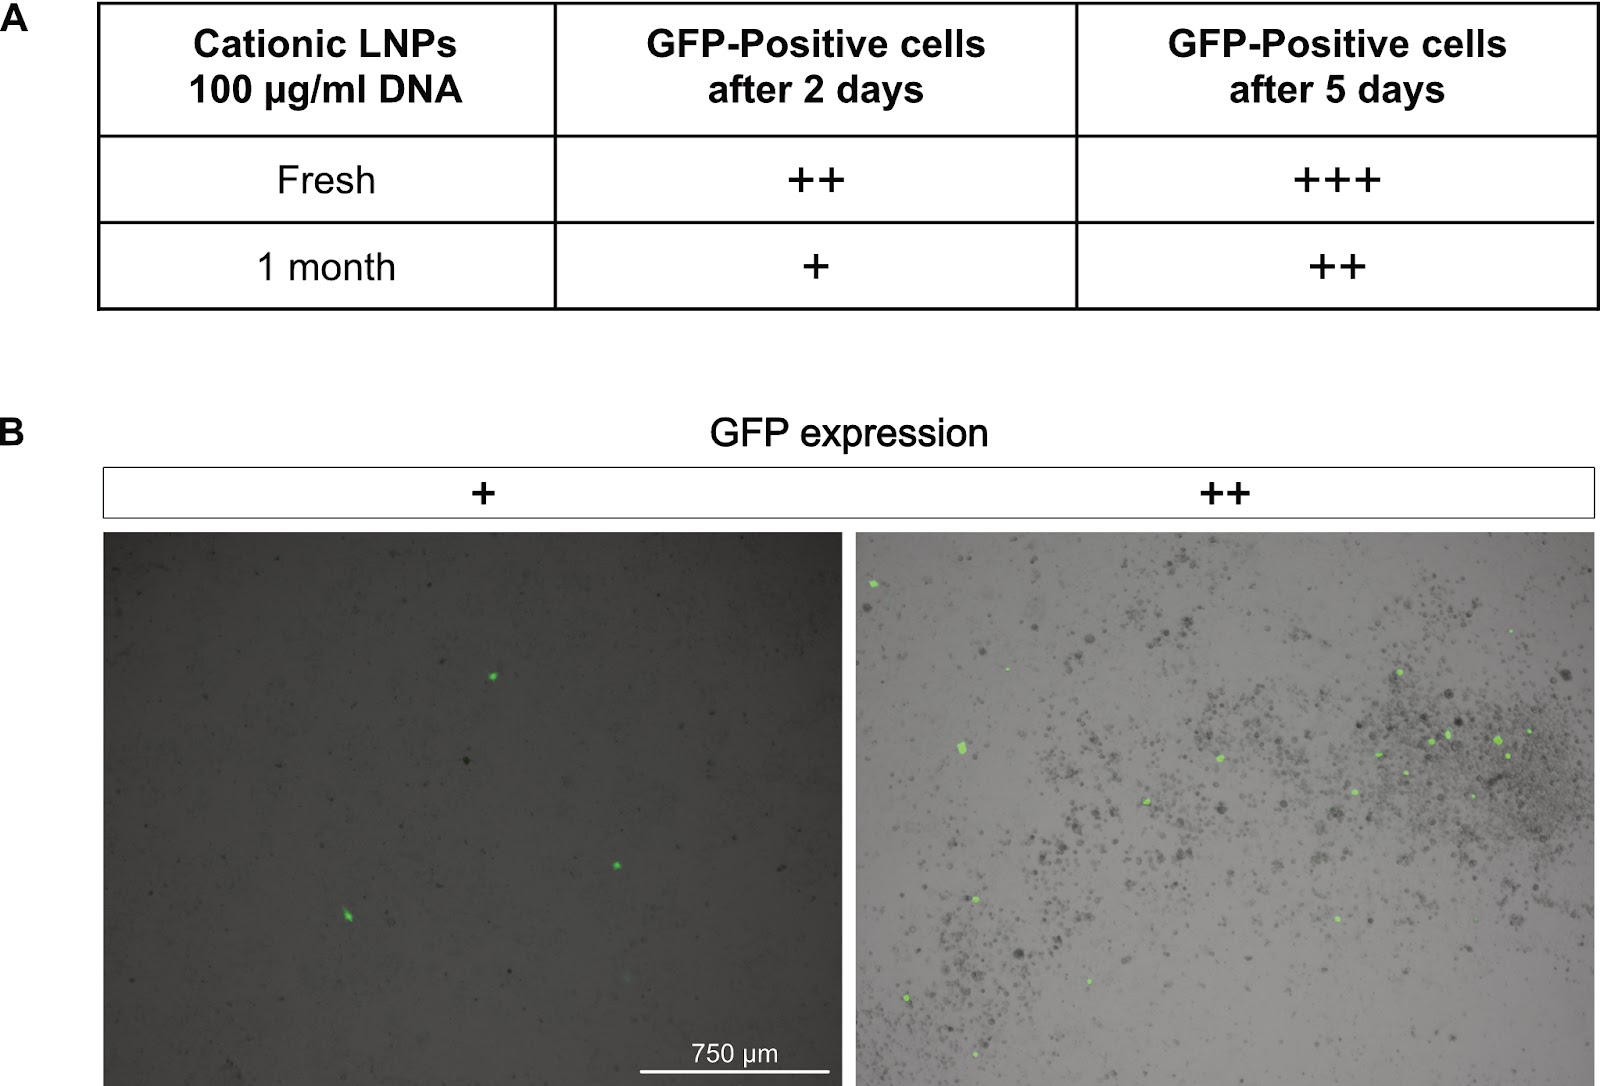
**

**Figure S5** GFP expression after administration of fresh or 1 month old Cationic LNPs with 100 µg/mL pDNA on COS-7 cells. A) eGFP expression was analyzed after 2 and 5 days of incubation with LNPs and detection of eGFP was expressed as +. B) Examples of COS-7 images reporting different levels of expression.
